# Supplementary material for: Dynein-mediated trafficking negatively regulates LET-23 EGFR signaling
Source: PubMed Central journal article supplement — Mol Biol Cell. 2016 Nov 15;27(23):3771–9. doi: 10.1091/mbc.E15-11-0757 (PMC5170559; doi:10.1091/mbc.e15-11-0757), 2016-11-15
Supplement: supp_E15-11-0757v1_CombinedSupMats.pdf [file supp_E15-11-0757v1_CombinedSupMats.pdf]

# Supplemental Materials

*Molecular Biology of the Cell*

Skorobogata et al.

**S1 Table. Strains used in this study.**

BC700 *sDf4/bli-4(e937) dpy-14(e188)* I  
CB1309 *lin-2(e1309)* X  
CB1413 *lin-7(e1413)* II  
CB1417 *lin-3(e1417)* IV  
CB4856 (Hawaiian mapping strain)  
EU828 *dhc-1(or195)* I  
EU1386 *dhc-1(or352)* I  
EU1444 *unc-119(ed3)* III; *orIs17[Pdhc-1::GFP::DHC-1; unc-119(+)]*  
JK323 *qDf3/szT1[lon-2(e678)]* I; *+/szT1* X  
JU2039 *mfls70[lin-3lp::rde-1, myo2p::GFP]* IV; *rde-1(ne219)* V  
KR1737 *hDf6 dpy-5(e61) unc-13(e450)* I; *hDp31(I;f)*  
MT2124 *let-60(n1046)* IV  
N2 (Bristol wild-type parent strain)  
PS80 *let-23(sy1) unc-4(e120)* II  
PS295 *let-23(sy97) unc-4(e120)/mnC1[dpy-10(e128) unc-152(e444)]* II  
QR160 *dhc-1(vh22)* I (this study)  
QR253 *dhc-1(vh22)* I; *lin-2(e1309)* X (this study)  
QR298 *dhc-1(vh22)* I; *let-60(n1046)* IV (this study)  
QR362 *dhc-1(vh22)* I; *orIs17[Pdhc-1::GFP::DHC-1; unc-119(+)]*; *lin-2(e1309)* X (this study)  
QR367 *dhc-1(vh22)* I; *let-23(sy1) unc-4* II (this study)  
QR371 *dhc-1(vh22)* I; *lin-3(e1314)* IV (this study)  
QR405 *mfls70[lin-3lp::rde-1, myo2p::GFP]* IV; *rde-1(ne219)* V; *lin-2(e1309)* X (this study)  
QR476 *zhIs038[Plet-23::LET-23::GFP; unc-119(+)]* IV; *lin-2(e1309)* X (Skorobogata et al. 2014)  
QR509 *dhc-1(vh22)* I; *zhIs038[Plet-23::LET-23::GFP; unc-119(+)]* IV (this study)  
QR522 *dhc-1(vh22)* I; *let-23(sy97) unc-43/mnC1[dpy-10(e128) unc-152(e444)]* II (this study)  
QR548 *rab-7(ok511)/mIn1[mIs14 dpy-10(e128)]* II; *zhIs038[Plet-23::LET-23::GFP; unc-119(+)]* IV (this study)  
QR632 *dhc-1(vh22)* I; *zhIs038[Plet-23::LET-23::GFP; unc-119(+)]* IV; *lin-2(e1309)* (this study)  
QR633 *rab-7(ok511)/mIn1[mIs14 dpy-10(e128)]* II; *zhIs038[Plet-23::LET-23::GFP; unc-119(+)]* IV; *lin-2(e1309)* X (this study)  
QR634 *dhc-1(vh22)* I; *lin-7(e1413)* II (this study)  
QR670 *dhc-1(or195)* I; *zhIs038[Plet-23::LET-23::GFP; unc-119(+)]* IV (this study)  
QR671 *dhc-1(vh22)* I; *rab-7(ok511)/mIn1*; *zhIs038[Plet-23::LET-23::GFP; unc-119(+)]* IV (this study)  
SP1540 *mnDf11/unc-13(e1091) lin-11(n566)* I  
*zhIs038[Plet-23::LET-23::GFP; unc-119(+)]* IV (Alex Hajnal, University of Zurich)

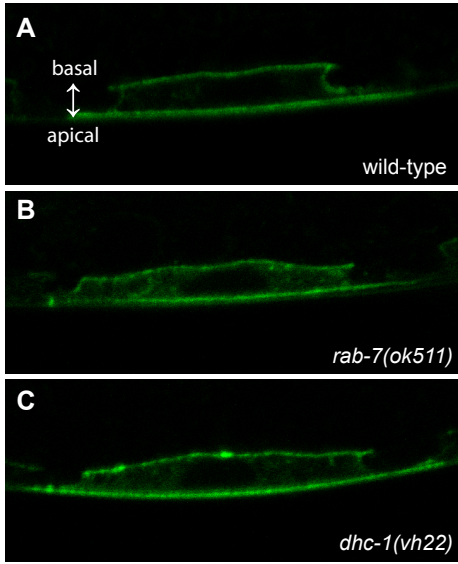

**SUPPLEMENTAL FIGURE S1:** LET-23::GFP localization in P6.p. (A-C) Representative confocal images of LET-23::GFP localization in the P6.p cell of animals carrying the *zhIs038* transgene. (A) wild-type, (B) *rab-7(ok511)* and (C) *dhc-1(vh22)* animals. Some punctate LET-23::GFP structures can be seen in P6.p in some *rab-7(ok511)* animals. However, this punctate localization pattern is more consistently seen in the P6.p daughters.
